# Supplementary material for: Static magnetic fields reduce epileptiform activity in anesthetized rat and monkey
Source: PubMed Central journal article supplement (PMC6207659; doi:10.1038/s41598-018-33808-x), 2018-10-30
Supplement: 41598_2018_33808_MOESM1_ESM.pdf [file 41598_2018_33808_MOESM1_ESM.pdf]

### Static magnetic fields reduce epileptiform activity in anesthetized rat and monkey

Rivadulla Casto, Aguilar Juan, Coletti Marcos, Aguila Jordi, Prieto Sandra, Cudeiro Javier

| Time from<br>Pilocarpine<br>injection<br>(minutes) | PowerV <sup>2</sup> /Hz. 1-8 Hz | SEM     | PowerV <sup>2</sup> /Hz. 1-8 Hz | SEM     |
|----------------------------------------------------|---------------------------------|---------|---------------------------------|---------|
|                                                    | Sham (Mean)                     |         | Magnet (Mean)                   |         |
| -45                                                | 0,0032                          | 0,0011  | 0,0018                          | 0,0008  |
| -15                                                | 0,0036                          | 0,0013  | 0,00165                         | 0,0009  |
| 15                                                 | 0,00645                         | 0,0029  | 0,00215                         | 0,0004  |
| 45                                                 | 0,0166                          | 0,0033  | 0,0032                          | 0,0016  |
| 90                                                 | 0,01225                         | 0,0021  | 0,0032                          | 0,0009  |
| 150                                                | 0,009                           | 0,00098 | 0,0045                          | 0,00087 |

Supp table 1: numerical values of data represented in figure 3A

**Static magnetic fields reduce epileptiform activity in anesthetized rat and monkey**

Rivadulla Casto, Aguilar Juan, Coletti Marcos, Aguila Jordi, Prieto Sandra, Cudeiro Javier

| Time from Pilocarpine injection (minutes) | % of change in control EEG Root Mean Square Sham (Mean) | SEM        | % of change in control EEG Root Mean Square Magnet (Mean) | SEM        |
|-------------------------------------------|---------------------------------------------------------|------------|-----------------------------------------------------------|------------|
| -60                                       | -4,03729205                                             | 1,65068692 | 0,62709489                                                | 2,96269356 |
| -50                                       | 2,23885664                                              | 1,1294745  | -0,38274535                                               | 2,0759358  |
| -40                                       | 1,79843542                                              | 0,99496995 | -0,24434955                                               | 2,60540141 |
| -30                                       | 4,52743077                                              | 1,10412075 | -4,15867978                                               | 4,36972379 |
| -20                                       | 7,60484235                                              | 2,95814399 | -4,87342466                                               | 5,82760531 |
| -10                                       | 8,67847118                                              | 1,67056896 | 3,77170182                                                | 4,316097   |
| 0                                         | 7,79175057                                              | 2,93722118 | -3,65172133                                               | 5,09574671 |
| 10                                        | 27,7172273                                              | 6,84459423 | -3,33233888                                               | 4,0331728  |
| 20                                        | 16,7922179                                              | 3,00693104 | -5,15076216                                               | 5,37532509 |
| 30                                        | 25,6384785                                              | 6,73117495 | 6,15870996                                                | 6,04030913 |
| 40                                        | 52,7555531                                              | 13,4091995 | 14,0661574                                                | 6,34920507 |
| 50                                        | 89,4747714                                              | 22,6847556 | 30,4209819                                                | 11,7188908 |
| 60                                        | 57,6960164                                              | 7,39938557 | 34,4794224                                                | 9,03799925 |
| 70                                        | 63,5622565                                              | 6,36900788 | 33,2676614                                                | 8,92587073 |
| 80                                        | 71,7597997                                              | 10,8169411 | 38,0332149                                                | 8,25732835 |
| 90                                        | 59,6137067                                              | 6,94480474 | 52,4485474                                                | 12,491417  |
| 100                                       | 52,3878403                                              | 4,70226119 | 56,360198                                                 | 10,7778127 |
| 110                                       | 57,5319895                                              | 5,57241807 | 59,3285127                                                | 13,1641269 |
| 120                                       | 60,8644327                                              | 4,9281708  | 59,5216672                                                | 9,7923924  |
| 130                                       | 51,5629974                                              | 5,7220324  | 60,1455757                                                | 11,5722356 |
| 140                                       | 49,889291                                               | 6,72149266 | 71,4714056                                                | 9,04599961 |
| 150                                       | 46,166058                                               | 7,73808863 | 57,8021675                                                | 12,6606453 |

|     |            |            |            |            |
|-----|------------|------------|------------|------------|
| 160 | 46,6552999 | 7,33055501 | 61,833101  | 10,1210298 |
| 170 | 54,5341508 | 6,53663175 | 42,6379906 | 17,3394381 |
| 180 | 53,094101  | 9,11108537 | 60,2356422 | 17,5027502 |
| 190 | 46,4538748 | 8,12226108 | 58,4653603 | 11,3765829 |
| 200 | 36,2635323 | 9,85033515 | 42,3545967 | 15,4771883 |
| 210 | 32,0883203 | 12,9677919 | 40,6349769 | 24,3607722 |
| 220 | 36,6387374 | 12,2248234 | 47,9285506 | 15,7656654 |
| 230 | 48,8624777 | 8,43251895 | 50,027876  | 14,0169465 |
| 240 | 23,9569205 | 11,6782371 | 38,751728  | 24,2763264 |
| 250 | 51,1290613 | 8,34463754 | 70,2683912 | 16,2662339 |
| 260 | 54,4080337 | 7,74947904 | 59,8305322 | 12,6742682 |
| 270 | 47,9262517 | 7,29395892 | 66,7281657 | 14,7672515 |
| 280 | 46,2713818 | 6,1763316  | 61,8273496 | 18,5801858 |

Supp table 2: numerical values of data represented in figure 3B

### Static magnetic fields reduce epileptiform activity in anesthetized rat and monkey

Rivadulla Casto, Aguilar Juan, Coletti Marcos, Aguila Jordi, Prieto Sandra, Cudeiro Javier

| Time (min)<br>from first<br>Pilocarpine<br>injection | % of change in peak to<br>peak amplitude (Mean)<br>SHAM | SEM   | % of change in peak to<br>peak amplitude (Mean)<br>MAGNET | SEM      |
|------------------------------------------------------|---------------------------------------------------------|-------|-----------------------------------------------------------|----------|
| -60                                                  | 1                                                       | 0     | 1                                                         | 0        |
| -30                                                  | 0,79669                                                 | 0,051 | 0,79669                                                   | 0,0276   |
| 0                                                    | 0,816165                                                | 0,030 | 0,871908                                                  | 0,0312   |
| 30                                                   | 1,419978                                                | 0,096 | 1,194406                                                  | 0,0446   |
| 60                                                   | 2,293282                                                | 0,208 | 1,180213                                                  | 0,0520   |
| 90                                                   | 2,176007                                                | 0,194 | 1,214168                                                  | 0,062461 |
| 120                                                  | 1,494477                                                | 0,100 | 1,199679                                                  | 0,0582   |
| 150                                                  | 1,041988                                                | 0,086 | 1,239624                                                  | 0,0945   |

Supp table 3: numerical values of data represented in figure 4B
